# Supplementary material
Source: Springer Nature journal article supplement (https://www.springermedizin.de/resource/supplementary/12950_2012_293_MOESM4_ESM.pdf/9557504)

# A PRLr

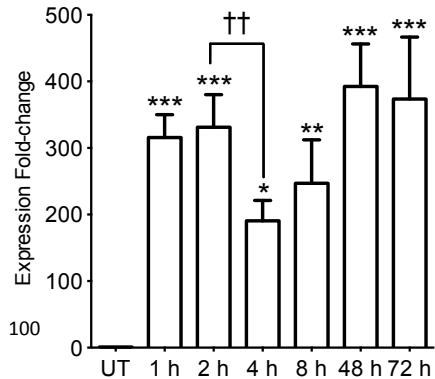

# B PRL

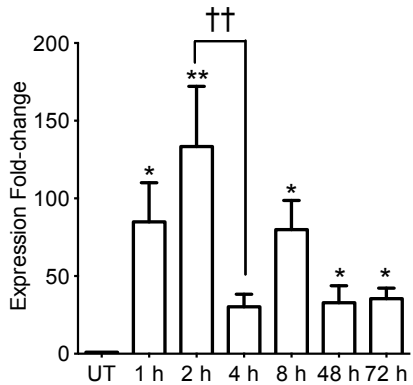

Supplement: MOESM4 [file 9557504]
